# Supplementary material
Source: Elsevier journal article supplement (https://infoscience.epfl.ch/record/210766/files/mmc1.doc)
Supplement: mmc1 [file mmc1.doc]

**Electrochemical Detection of Free Chlorine at Inkjet Printed Silver Electrodes**

***––––––––––––––––––––SUPPORTING INFORMATION–––––––––––––––––––***

Milica Jovića, Fernando Cortés-Salazara, Andreas Lescha, Véronique Amstutza, Hongyan Bia1, Hubert H. Giraulta*

aLaboratoire d’Electrochimie Physique et Analytique, École Polytechnique Fédérale de Lausanne – Valais Wallis, [[1]](#footnote-2)CH-1951 Sion, Switzerland

*CORRESPONDING AUTHOR FOOTNOTE

EMAIL: hubert.girault@epfl.ch

Telephone number: +41 (0)21 693 31 51

Fax number: +41 (0)21 693 36 67

TABLE OF CONTENT

A. SEM images of silver electrodes after the reaction with free chlorine……………..….2

B. XPS analysis of inkjet printed silver electrodes……………………………………….3

C. LSV of silver electrode in the presence of hypobromite and hypoiodite ………...…..4

**A. SEM images of silver electrodes after the reaction with free chlorine**

SEM analysis was used to examine the silver surface after the reaction with free chlorine. From liner sweep voltammograms could be observed that pH of free chlorine solution has a big influence on detection (Fig. 7). The highest sensitivity was obtained on pH 8, followed by pH 5.8 and finally pH 9. In order to see electrode surface area after the reaction with free chlorine at different pH, we performed SEM analysis of silver surface after the reaction with three mentioned pH values (Fig. A.1). On all three pictures could be seen concave-cubical crystals of AgCl/Ag2O but with different coverage of the electrode area. It is evident that the highest electrode area is covered with crystals at pH 8 (Fig. A.1b), then pH 5.8 (Fig. A.1a) and pH 9 (Fig. A.1c), confirming the same trend observed with LSV.


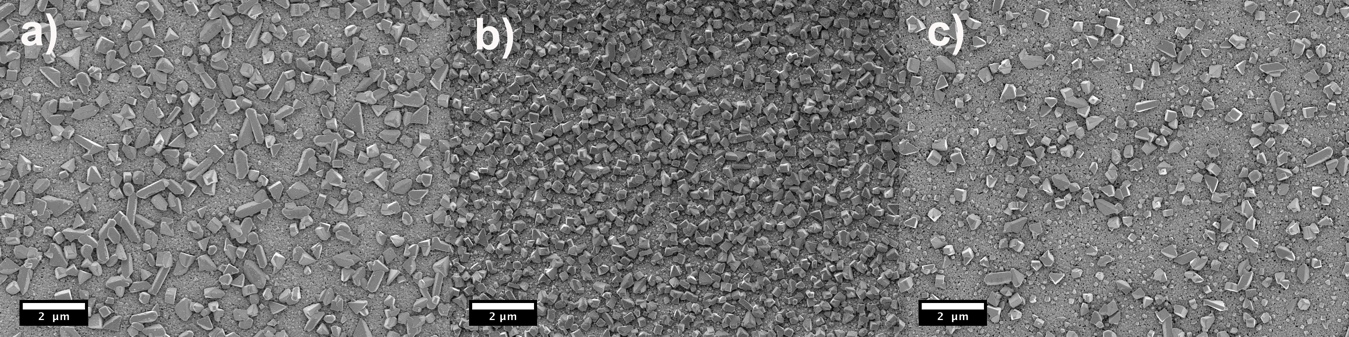


**Figure A.1** SEM HR images of inkjet printed silver electrode after reaction with 16 ppm free chlorine solution at pH 5.8 a), pH 8 b) and pH 9 c) (magnification 50 000x).

**B.** **XPS analysis of inkjet printed silver electrodes**

XPS analysis was performed in order to further investigate composition of formed AgCl/Ag2O layer on the silver electrode surface. Four different electrodes were analyzed: bare silver electrode, silver electrode after the reaction with 16 ppm of NaClO at pH 5.8, pH 8 and pH 9. Bare silver electrode contained Ag, O and C (1s). O (1s) is present due to silver oxidation and C from silver ink formulation. After the reaction with free chlorine species evident was the presence of Cl (2s, 2p) and O (1s), which ratio was depended on the pH of the media. O (1s) is mostly present on the electrode the after the reaction with free chlorine at pH 9 (Fig. B.1.b), while Cl (2p) after the reaction with free chlorine at pH 8 (Fig. B.1.c).


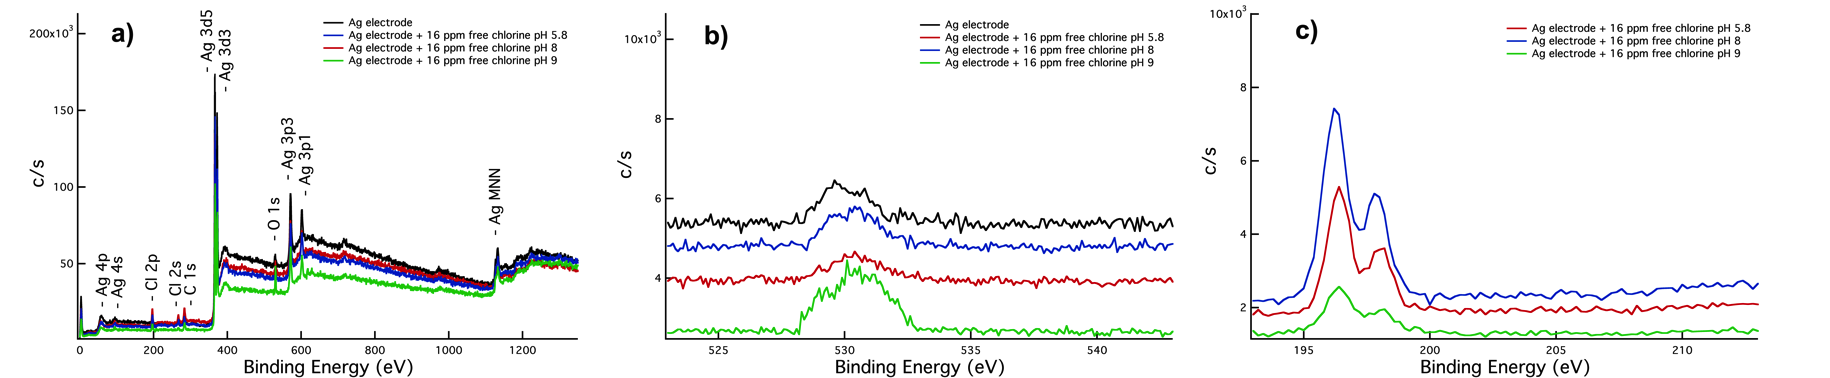


**Figure B.1** XPS spectra of bare inkjet printed silver electrode and after reaction with 16 ppm of free chlorine in different buffer solutions: general survey a), multiplex of O (1s) b) and multiplex of Cl (2p) c).

**C. LSV of silver electrode in the presence of hypobromite and hypoiodite**

With the aim to study influence of species that could interfere with free chlorine determination by forming silver halide, we examined linear sweep voltammograms of inkjet printed silver electrode in the presence of hypobromite and hypoiodite which upon the reaction with silver formed AgBr and AgI, respectively (Fig. C.1). From LSV could be seen that stripping potential of AgBr and AgI (depending on the concentration) is close to the AgCl, and in the case of their higher concentration can cause overlap in the signal.


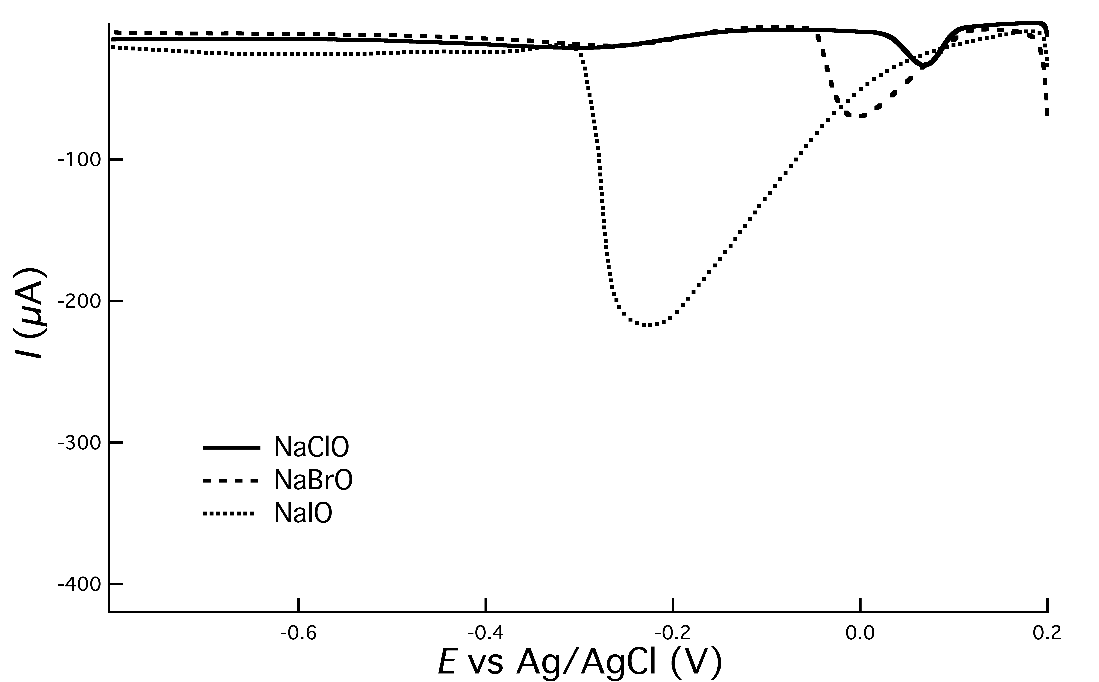


**Figure C.1** Linear sweep voltammograms of inkjet printed silver electrodes in the presence of NaClO, NaBrO and NaIO. Starting potential 0.2 V, reaction time 200 s, scan rate 100 mV s–1.

1. Present address

   Hongyan Bi

   International Iberian Nanotechnology Laboratory (INL), Av. Mestre José Veiga, 4715-330 Braga, Portugal [↑](#footnote-ref-2)
